# Supplementary material
Source: publisher figshare collection journal article supplement (https://acs.figshare.com/ndownloader/files/4009198)
Supplement: Supplementary file 1 [file 4009198]

 
data_mak1301_250k 
 
_audit_creation_method            SHELXL-97 
_chemical_name_systematic 
; 
 ? 
; 
_chemical_name_common             ? 
_chemical_melting_point           ? 
_chemical_formula_moiety          'C36 H36 B2 Fe N10 S2, 2(C7 H8)' 
_chemical_formula_sum             'C50 H52 B2 Fe N10 S2' 
_chemical_formula_weight          934.61 
 
loop_ 
 _atom_type_symbol 
 _atom_type_description 
 _atom_type_scat_dispersion_real 
 _atom_type_scat_dispersion_imag 
 _atom_type_scat_source 
 'C'  'C'   0.0033   0.0016 
 'International Tables Vol C Tables 4.2.6.8 and 6.1.1.4' 
 'H'  'H'   0.0000   0.0000 
 'International Tables Vol C Tables 4.2.6.8 and 6.1.1.4' 
 'N'  'N'   0.0061   0.0033 
 'International Tables Vol C Tables 4.2.6.8 and 6.1.1.4' 
 'B'  'B'   0.0013   0.0007 
 'International Tables Vol C Tables 4.2.6.8 and 6.1.1.4' 
 'S'  'S'   0.1246   0.1234 
 'International Tables Vol C Tables 4.2.6.8 and 6.1.1.4' 
 'Fe'  'Fe'   0.3463   0.8444 
 'International Tables Vol C Tables 4.2.6.8 and 6.1.1.4' 
 
_symmetry_cell_setting            triclinic
_symmetry_space_group_name_H-M    P-1
_symmetry_space_group_name_Hall   -P1
 
loop_ 
 _symmetry_equiv_pos_as_xyz 
 'x, y, z' 
 '-x, -y, -z' 
 
_cell_length_a                    13.3090(13) 
_cell_length_b                    15.1515(15) 
_cell_length_c                    15.4112(14) 
_cell_angle_alpha                 63.665(5) 
_cell_angle_beta                  67.376(5) 
_cell_angle_gamma                 67.038(5) 
_cell_volume                      2478.7(4) 
_cell_formula_units_Z             2 
_cell_measurement_temperature     250(2) 
_cell_measurement_reflns_used    3454
_cell_measurement_theta_min        2.53
_cell_measurement_theta_max       20.08
 
_exptl_crystal_description        plate
_exptl_crystal_colour             violet 
_exptl_crystal_size_max           0.44 
_exptl_crystal_size_mid           0.20 
_exptl_crystal_size_min           0.04 
_exptl_crystal_density_meas       ? 
_exptl_crystal_density_diffrn     1.252 
_exptl_crystal_density_method     'not measured' 
_exptl_crystal_F_000              980 
_exptl_absorpt_coefficient_mu     0.433 
_exptl_absorpt_correction_type    multi-scan
_exptl_absorpt_correction_T_min   0.537
_exptl_absorpt_correction_T_max   0.746
_exptl_absorpt_process_details    'SADABS, Bruker-AXS, 2002'
 
_exptl_special_details 
; 
 ? 
; 
 
_diffrn_ambient_temperature       250(2) 
_diffrn_radiation_wavelength      0.71073 
_diffrn_radiation_type            MoK\a 
_diffrn_radiation_source          'fine-focus sealed tube' 
_diffrn_radiation_monochromator   graphite 
_diffrn_measurement_device_type   'Bruker Smart APEX II CCD area detector'
_diffrn_measurement_method        'phi and omega scans'
_diffrn_detector_area_resol_mean  83.33 
_diffrn_standards_number          ? 
_diffrn_standards_interval_count  ? 
_diffrn_standards_interval_time   ? 
_diffrn_standards_decay_%         ? 
_diffrn_reflns_number             28321 
_diffrn_reflns_av_R_equivalents   0.0847 
_diffrn_reflns_av_sigmaI/netI     0.1098 
_diffrn_reflns_limit_h_min        -16 
_diffrn_reflns_limit_h_max        16 
_diffrn_reflns_limit_k_min        -18 
_diffrn_reflns_limit_k_max        18 
_diffrn_reflns_limit_l_min        -18 
_diffrn_reflns_limit_l_max        18 
_diffrn_reflns_theta_min          2.53 
_diffrn_reflns_theta_max          25.68 
_reflns_number_total              9115 
_reflns_number_gt                 4350 
_reflns_threshold_expression      >2sigma(I) 
 
_computing_data_collection        'Bruker APEX2'
_computing_cell_refinement        'Bruker SAINT' 
_computing_data_reduction         'Bruker SAINT' 
_computing_structure_solution     'SHELXTL 6.12 (Bruker AXS, 2002)'
_computing_structure_refinement   'SHELXTL 6.12 (Bruker AXS, 2002)'
_computing_molecular_graphics     'SHELXTL 6.12 (Bruker AXS, 2002)'
_computing_publication_material   'SHELXTL 6.12 (Bruker AXS, 2002)'
 
 
_refine_special_details 
; 
 Refinement of F^2^ against ALL reflections.  The weighted R-factor wR and 
 goodness of fit S are based on F^2^, conventional R-factors R are based 
 on F, with F set to zero for negative F^2^. The threshold expression of 
 F^2^ > 2sigma(F^2^) is used only for calculating R-factors(gt) etc. and is 
 not relevant to the choice of reflections for refinement.  R-factors based 
 on F^2^ are statistically about twice as large as those based on F, and R- 
 factors based on ALL data will be even larger. 
; 
 
_refine_ls_structure_factor_coef  Fsqd  
_refine_ls_matrix_type            full 
_refine_ls_weighting_scheme       calc  
_refine_ls_weighting_details 
 'calc w=1/[\s^2^(Fo^2^)+(0.0926P)^2^+0.5369P] where P=(Fo^2^+2Fc^2^)/3' 
_atom_sites_solution_primary      direct 
_atom_sites_solution_secondary    difmap 
_atom_sites_solution_hydrogens    geom 
_refine_ls_hydrogen_treatment     constr 
_refine_ls_extinction_method      none 
_refine_ls_extinction_coef        ? 
_refine_ls_number_reflns          9115 
_refine_ls_number_parameters      696 
_refine_ls_number_restraints      149 
_refine_ls_R_factor_all           0.1570 
_refine_ls_R_factor_gt            0.0636 
_refine_ls_wR_factor_ref          0.1946 
_refine_ls_wR_factor_gt           0.1482 
_refine_ls_goodness_of_fit_ref    0.962 
_refine_ls_restrained_S_all       0.962 
_refine_ls_shift/su_max           0.000 
_refine_ls_shift/su_mean          0.000 
 
loop_ 
 _atom_site_label 
 _atom_site_type_symbol 
 _atom_site_fract_x 
 _atom_site_fract_y 
 _atom_site_fract_z 
 _atom_site_U_iso_or_equiv 
 _atom_site_adp_type 
 _atom_site_occupancy 
 _atom_site_symmetry_multiplicity 
 _atom_site_calc_flag 
 _atom_site_refinement_flags 
 _atom_site_disorder_assembly 
 _atom_site_disorder_group 
Fe1 Fe 0.02314(5) 0.35301(4) 0.26832(4) 0.0499(2) Uani 1 1 d . . . 
S1 S 0.65206(14) -0.15295(12) 0.42235(13) 0.0967(5) Uani 1 1 d . . . 
S2 S 0.7412(3) -0.0063(3) 0.0153(3) 0.0812(12) Uani 0.701(6) 1 d P A 1 
S2A S 0.7582(6) 0.0720(7) -0.0145(6) 0.082(2) Uani 0.299(6) 1 d P A 2 
N1 N 0.1152(3) 0.1988(3) 0.3441(2) 0.0511(9) Uani 1 1 d . . . 
N2 N 0.1841(3) 0.3247(2) 0.1594(2) 0.0512(9) Uani 1 1 d . . . 
N3 N -0.0551(3) 0.3118(3) 0.1969(3) 0.0588(10) Uani 1 1 d . . . 
N4 N -0.1521(4) 0.2814(3) 0.2441(3) 0.0608(10) Uani 1 1 d . . . 
N5 N -0.2065(3) 0.3084(3) 0.4085(3) 0.0573(10) Uani 1 1 d . . . 
N6 N -0.1253(3) 0.3510(3) 0.3908(3) 0.0534(9) Uani 1 1 d . . . 
N7 N -0.0455(3) 0.5106(3) 0.1899(3) 0.0535(9) Uani 1 1 d . . . 
N8 N -0.0157(3) 0.5882(3) 0.1862(3) 0.0583(10) Uani 1 1 d . . . 
N9 N 0.1070(3) 0.4970(3) 0.3074(3) 0.0565(10) Uani 1 1 d . . . 
N10 N 0.0975(3) 0.3999(3) 0.3387(3) 0.0541(9) Uani 1 1 d . . . 
B1 B -0.1873(6) 0.2318(5) 0.3590(4) 0.0707(17) Uani 1 1 d . . . 
H1A H -0.1282 0.1702 0.3814 0.085 Uiso 1 1 calc R . . 
H1B H -0.2570 0.2119 0.3791 0.085 Uiso 1 1 calc R . . 
B2 B 0.0996(5) 0.5731(4) 0.2008(4) 0.0685(16) Uani 1 1 d . . . 
H2A H 0.1612 0.5465 0.1508 0.082 Uiso 1 1 calc R . . 
H2B H 0.1067 0.6387 0.1920 0.082 Uiso 1 1 calc R . . 
C1 C 0.2245(4) 0.1694(3) 0.2953(3) 0.0474(10) Uani 1 1 d . . . 
C2 C 0.0813(4) 0.1392(3) 0.4378(3) 0.0567(12) Uani 1 1 d . . . 
H2 H 0.0057 0.1583 0.4730 0.068 Uiso 1 1 calc R . . 
C3 C 0.1514(4) 0.0512(3) 0.4854(3) 0.0612(13) Uani 1 1 d . . . 
H3 H 0.1232 0.0118 0.5519 0.073 Uiso 1 1 calc R . . 
C4 C 0.2615(4) 0.0203(3) 0.4373(3) 0.0611(13) Uani 1 1 d . . . 
H4 H 0.3096 -0.0400 0.4702 0.073 Uiso 1 1 calc R . . 
C5 C 0.3022(4) 0.0804(3) 0.3372(3) 0.0523(11) Uani 1 1 d . . . 
C6 C 0.4163(4) 0.0533(3) 0.2796(3) 0.0548(12) Uani 1 1 d . . . 
C7 C 0.4504(4) 0.1133(3) 0.1807(3) 0.0567(12) Uani 1 1 d . . . 
C8 C 0.3716(4) 0.2067(3) 0.1381(3) 0.0520(11) Uani 1 1 d . . . 
C9 C 0.4007(4) 0.2736(4) 0.0387(3) 0.0629(13) Uani 1 1 d . . . 
H9 H 0.4727 0.2565 -0.0035 0.075 Uiso 1 1 calc R . . 
C10 C 0.3243(4) 0.3626(4) 0.0042(3) 0.0658(14) Uani 1 1 d . . . 
H10 H 0.3439 0.4084 -0.0613 0.079 Uiso 1 1 calc R . . 
C11 C 0.2173(4) 0.3857(4) 0.0658(3) 0.0614(13) Uani 1 1 d . . . 
H11 H 0.1655 0.4475 0.0404 0.074 Uiso 1 1 calc R . . 
C12 C 0.2623(4) 0.2359(3) 0.1934(3) 0.0471(11) Uani 1 1 d . . . 
C13 C 0.4980(4) -0.0389(4) 0.3315(4) 0.0643(13) Uani 1 1 d . . . 
C14 C 0.4990(5) -0.1411(4) 0.3560(4) 0.0806(16) Uani 1 1 d U . . 
H14 H 0.4483 -0.1571 0.3401 0.097 Uiso 1 1 calc R . . 
C15 C 0.5779(4) -0.2143(4) 0.4038(4) 0.0770(16) Uani 1 1 d U . . 
C16 C 0.5759(5) -0.0336(4) 0.3628(4) 0.0748(15) Uani 1 1 d . . . 
C17 C 0.6079(5) -0.3257(4) 0.4373(5) 0.107(2) Uani 1 1 d . . . 
H17A H 0.5497 -0.3470 0.4345 0.161 Uiso 1 1 calc R . . 
H17B H 0.6145 -0.3541 0.5056 0.161 Uiso 1 1 calc R . . 
H17C H 0.6794 -0.3499 0.3941 0.161 Uiso 1 1 calc R . . 
C18 C 0.6010(6) 0.0600(5) 0.3542(5) 0.106(2) Uani 1 1 d . . . 
H18A H 0.5845 0.1156 0.2939 0.159 Uiso 1 1 calc R . . 
H18B H 0.6801 0.0441 0.3510 0.159 Uiso 1 1 calc R . . 
H18C H 0.5546 0.0799 0.4122 0.159 Uiso 1 1 calc R . . 
C19 C 0.5648(4) 0.0823(4) 0.1170(4) 0.0656(13) Uani 1 1 d . A . 
C20 C 0.6470(5) 0.1378(5) 0.0769(4) 0.0810(16) Uani 1 1 d . . . 
H20 H 0.6296 0.1988 0.0882 0.097 Uiso 0.701(6) 1 calc PR A 1 
C21 C 0.7467(9) 0.1032(9) 0.0244(8) 0.074(3) Uani 0.701(6) 1 d P A 1 
C22 C 0.6015(5) -0.0001(4) 0.0874(4) 0.0767(15) Uani 1 1 d . . . 
H22 H 0.5584 -0.0478 0.1235 0.092 Uiso 0.299(6) 1 calc PR A 2 
C23 C 0.8480(7) 0.1399(7) -0.0272(6) 0.100(3) Uani 0.701(6) 1 d P A 1 
H23A H 0.9108 0.0883 -0.0013 0.150 Uiso 0.701(6) 1 calc PR A 1 
H23B H 0.8354 0.2021 -0.0162 0.150 Uiso 0.701(6) 1 calc PR A 1 
H23C H 0.8650 0.1538 -0.0984 0.150 Uiso 0.701(6) 1 calc PR A 1 
C24 C 0.5480(7) -0.0758(6) 0.1099(6) 0.088(3) Uani 0.701(6) 1 d P A 1 
H24A H 0.5676 -0.0931 0.0508 0.132 Uiso 0.701(6) 1 calc PR A 1 
H24B H 0.4668 -0.0494 0.1306 0.132 Uiso 0.701(6) 1 calc PR A 1 
H24C H 0.5733 -0.1365 0.1636 0.132 Uiso 0.701(6) 1 calc PR A 1 
C25 C -0.0440(5) 0.3391(4) 0.0980(4) 0.0714(14) Uani 1 1 d . . . 
H25 H 0.0161 0.3631 0.0467 0.086 Uiso 1 1 calc R . . 
C26 C -0.1323(5) 0.3273(4) 0.0825(4) 0.0798(16) Uani 1 1 d . . . 
H26 H -0.1445 0.3411 0.0210 0.096 Uiso 1 1 calc R . . 
C27 C -0.1984(5) 0.2907(4) 0.1766(4) 0.0763(15) Uani 1 1 d . . . 
H27 H -0.2659 0.2746 0.1913 0.092 Uiso 1 1 calc R . . 
C28 C -0.2954(5) 0.3385(5) 0.4775(4) 0.0805(16) Uani 1 1 d . . . 
H28 H -0.3626 0.3182 0.5039 0.097 Uiso 1 1 calc R . . 
C29 C -0.2745(5) 0.4025(4) 0.5039(4) 0.0818(17) Uani 1 1 d . . . 
H29 H -0.3227 0.4355 0.5502 0.098 Uiso 1 1 calc R . . 
C30 C -0.1666(5) 0.4084(4) 0.4476(4) 0.0656(13) Uani 1 1 d . . . 
H30 H -0.1277 0.4476 0.4492 0.079 Uiso 1 1 calc R . . 
C31 C -0.1466(4) 0.5502(4) 0.1720(3) 0.0626(13) Uani 1 1 d . . . 
H31 H -0.1879 0.5130 0.1705 0.075 Uiso 1 1 calc R . . 
C32 C -0.1828(5) 0.6529(4) 0.1560(4) 0.0823(16) Uani 1 1 d . . . 
H32 H -0.2513 0.6984 0.1418 0.099 Uiso 1 1 calc R . . 
C33 C -0.0982(5) 0.6749(4) 0.1652(4) 0.0765(15) Uani 1 1 d . . . 
H33 H -0.0976 0.7397 0.1580 0.092 Uiso 1 1 calc R . . 
C34 C 0.1351(4) 0.5075(4) 0.3760(4) 0.0712(14) Uani 1 1 d . . . 
H34 H 0.1473 0.5669 0.3708 0.085 Uiso 1 1 calc R . . 
C35 C 0.1430(4) 0.4171(4) 0.4553(4) 0.0759(15) Uani 1 1 d . . . 
H35 H 0.1613 0.4021 0.5144 0.091 Uiso 1 1 calc R . . 
C36 C 0.1182(4) 0.3531(4) 0.4297(3) 0.0638(13) Uani 1 1 d . . . 
H36 H 0.1160 0.2855 0.4706 0.077 Uiso 1 1 calc R . . 
C21A C 0.690(2) -0.022(3) 0.015(2) 0.079(9) Uani 0.299(6) 1 d P A 2 
C22A C 0.6541(17) 0.2229(16) 0.0712(16) 0.090(7) Uani 0.299(6) 1 d P A 2 
H22A H 0.7269 0.2130 0.0793 0.135 Uiso 0.299(6) 1 calc PR A 2 
H22B H 0.5945 0.2456 0.1236 0.135 Uiso 0.299(6) 1 calc PR A 2 
H22C H 0.6461 0.2741 0.0063 0.135 Uiso 0.299(6) 1 calc PR A 2 
C23A C 0.7451(19) -0.1021(16) -0.0315(17) 0.109(8) Uani 0.299(6) 1 d PU A 2 
H23D H 0.7487 -0.0714 -0.1025 0.163 Uiso 0.299(6) 1 calc PR A 2 
H23E H 0.7019 -0.1523 0.0001 0.163 Uiso 0.299(6) 1 calc PR A 2 
H23F H 0.8209 -0.1353 -0.0225 0.163 Uiso 0.299(6) 1 calc PR A 2 
C101 C 0.4714(6) 0.5339(6) 0.7211(5) 0.102(2) Uani 1 1 d . . . 
H101 H 0.4274 0.6004 0.6945 0.123 Uiso 1 1 calc R . . 
C102 C 0.4546(6) 0.4541(8) 0.7160(5) 0.110(2) Uani 1 1 d . . . 
H102 H 0.3986 0.4662 0.6861 0.132 Uiso 1 1 calc R . . 
C103 C 0.5168(8) 0.3568(7) 0.7530(6) 0.115(2) Uani 1 1 d . . . 
H103 H 0.5039 0.3022 0.7488 0.138 Uiso 1 1 calc R . . 
C104 C 0.5983(7) 0.3394(6) 0.7963(5) 0.109(2) Uani 1 1 d . . . 
H104 H 0.6427 0.2727 0.8218 0.130 Uiso 1 1 calc R . . 
C105 C 0.6143(6) 0.4204(8) 0.8021(5) 0.108(2) Uani 1 1 d . . . 
H105 H 0.6697 0.4082 0.8327 0.130 Uiso 1 1 calc R . . 
C106 C 0.5523(6) 0.5187(7) 0.7648(6) 0.109(2) Uani 1 1 d . . . 
C107 C 0.5739(8) 0.6069(7) 0.7695(8) 0.177(4) Uani 1 1 d . . . 
H10A H 0.5455 0.6063 0.8379 0.265 Uiso 1 1 calc R . . 
H10B H 0.5358 0.6706 0.7263 0.265 Uiso 1 1 calc R . . 
H10C H 0.6545 0.6004 0.7474 0.265 Uiso 1 1 calc R . . 
C201 C 0.9342(10) 0.1701(9) 0.6882(9) 0.088(2) Uani 0.701(10) 1 d PDU B 1 
H201 H 0.8879 0.2325 0.6562 0.105 Uiso 0.701(10) 1 calc PR B 1 
C202 C 1.0268(11) 0.1713(9) 0.7048(9) 0.106(3) Uani 0.701(10) 1 d PDU B 1 
H202 H 1.0457 0.2331 0.6810 0.127 Uiso 0.701(10) 1 calc PR B 1 
C203 C 1.0948(11) 0.0787(9) 0.7583(9) 0.116(3) Uani 0.701(10) 1 d PDU B 1 
H203 H 1.1576 0.0763 0.7742 0.140 Uiso 0.701(10) 1 calc PR B 1 
C204 C 1.0613(13) -0.0062(10) 0.7846(11) 0.119(3) Uani 0.701(10) 1 d PDU B 1 
H204 H 1.1064 -0.0684 0.8185 0.143 Uiso 0.701(10) 1 calc PR B 1 
C205 C 0.9746(10) -0.0125(8) 0.7690(8) 0.099(3) Uani 0.701(10) 1 d PDU B 1 
H205 H 0.9581 -0.0751 0.7908 0.118 Uiso 0.701(10) 1 calc PR B 1 
C206 C 0.9056(10) 0.0838(8) 0.7155(8) 0.094(2) Uani 0.701(10) 1 d PDU B 1 
C207 C 0.8151(9) 0.0844(9) 0.6925(8) 0.130(4) Uani 0.701(10) 1 d PDU B 1 
H20A H 0.7659 0.0494 0.7530 0.195 Uiso 0.701(10) 1 calc PR B 1 
H20B H 0.8421 0.0497 0.6447 0.195 Uiso 0.701(10) 1 calc PR B 1 
H20C H 0.7736 0.1543 0.6637 0.195 Uiso 0.701(10) 1 calc PR B 1 
C211 C 1.030(4) -0.019(3) 0.783(4) 0.180(8) Uani 0.299(10) 1 d PDU B 2 
H211 H 1.0571 -0.0905 0.8095 0.215 Uiso 0.299(10) 1 calc PR B 2 
C212 C 1.085(4) 0.039(3) 0.786(4) 0.179(8) Uani 0.299(10) 1 d PDU B 2 
H212 H 1.1370 0.0121 0.8247 0.214 Uiso 0.299(10) 1 calc PR B 2 
C213 C 1.058(3) 0.144(3) 0.723(4) 0.178(8) Uani 0.299(10) 1 d PDU B 2 
H213 H 1.1049 0.1866 0.7024 0.214 Uiso 0.299(10) 1 calc PR B 2 
C214 C 0.958(4) 0.180(3) 0.695(4) 0.176(8) Uani 0.299(10) 1 d PDU B 2 
H214 H 0.9260 0.2515 0.6767 0.211 Uiso 0.299(10) 1 calc PR B 2 
C215 C 0.902(3) 0.129(3) 0.692(3) 0.178(8) Uani 0.299(10) 1 d PDU B 2 
H215 H 0.8439 0.1587 0.6591 0.213 Uiso 0.299(10) 1 calc PR B 2 
C216 C 0.941(3) 0.019(2) 0.745(2) 0.179(8) Uani 0.299(10) 1 d PDU B 2 
C217 C 0.893(3) -0.051(2) 0.764(3) 0.182(9) Uani 0.299(10) 1 d PDU B 2 
H21A H 0.8169 -0.0182 0.7544 0.273 Uiso 0.299(10) 1 calc PR B 2 
H21B H 0.8883 -0.0974 0.8327 0.273 Uiso 0.299(10) 1 calc PR B 2 
H21C H 0.9367 -0.0891 0.7188 0.273 Uiso 0.299(10) 1 calc PR B 2 
 
loop_ 
 _atom_site_aniso_label 
 _atom_site_aniso_U_11 
 _atom_site_aniso_U_22 
 _atom_site_aniso_U_33 
 _atom_site_aniso_U_23 
 _atom_site_aniso_U_13 
 _atom_site_aniso_U_12 
Fe1 0.0561(4) 0.0434(4) 0.0367(4) -0.0056(3) -0.0112(3) -0.0102(3) 
S1 0.0831(11) 0.0826(11) 0.1011(12) -0.0046(9) -0.0455(10) -0.0091(8) 
S2 0.070(2) 0.078(3) 0.0704(17) -0.0289(16) 0.0018(18) -0.0114(19) 
S2A 0.071(4) 0.087(6) 0.073(5) -0.024(4) -0.008(3) -0.023(4) 
N1 0.059(3) 0.047(2) 0.033(2) -0.0058(17) -0.0081(18) -0.0129(18) 
N2 0.061(2) 0.043(2) 0.037(2) -0.0016(17) -0.0135(18) -0.0146(18) 
N3 0.070(3) 0.055(2) 0.042(2) -0.0069(18) -0.012(2) -0.021(2) 
N4 0.076(3) 0.053(2) 0.052(2) -0.0078(19) -0.019(2) -0.025(2) 
N5 0.061(3) 0.059(2) 0.040(2) -0.0037(19) -0.010(2) -0.021(2) 
N6 0.062(3) 0.048(2) 0.042(2) -0.0089(18) -0.0123(19) -0.014(2) 
N7 0.058(3) 0.050(2) 0.048(2) -0.0088(18) -0.0183(19) -0.0137(19) 
N8 0.065(3) 0.050(2) 0.053(2) -0.0095(18) -0.020(2) -0.013(2) 
N9 0.064(3) 0.055(2) 0.049(2) -0.0134(19) -0.016(2) -0.0173(19) 
N10 0.063(3) 0.051(2) 0.040(2) -0.0060(18) -0.0164(19) -0.0159(19) 
B1 0.081(4) 0.064(4) 0.057(4) -0.001(3) -0.016(3) -0.035(3) 
B2 0.081(4) 0.058(4) 0.064(4) -0.006(3) -0.020(3) -0.031(3) 
C1 0.057(3) 0.043(2) 0.035(2) -0.0081(19) -0.011(2) -0.013(2) 
C2 0.067(3) 0.050(3) 0.035(3) -0.006(2) -0.007(2) -0.014(2) 
C3 0.076(4) 0.049(3) 0.037(3) -0.001(2) -0.010(2) -0.016(3) 
C4 0.075(4) 0.049(3) 0.040(3) -0.001(2) -0.017(3) -0.012(3) 
C5 0.061(3) 0.044(3) 0.041(3) -0.006(2) -0.017(2) -0.010(2) 
C6 0.057(3) 0.049(3) 0.048(3) -0.012(2) -0.014(2) -0.009(2) 
C7 0.056(3) 0.049(3) 0.053(3) -0.013(2) -0.014(2) -0.007(2) 
C8 0.055(3) 0.052(3) 0.038(3) -0.010(2) -0.006(2) -0.016(2) 
C9 0.057(3) 0.067(3) 0.044(3) -0.007(2) -0.007(2) -0.016(3) 
C10 0.071(4) 0.070(3) 0.035(3) 0.001(2) -0.009(3) -0.025(3) 
C11 0.071(4) 0.058(3) 0.044(3) -0.003(2) -0.020(3) -0.017(3) 
C12 0.056(3) 0.045(3) 0.032(2) -0.0052(19) -0.012(2) -0.014(2) 
C13 0.060(3) 0.050(3) 0.059(3) -0.008(2) -0.015(3) -0.004(2) 
C14 0.073(4) 0.066(4) 0.086(4) -0.013(3) -0.020(3) -0.017(3) 
C15 0.047(3) 0.047(3) 0.090(4) 0.002(3) -0.021(3) 0.007(2) 
C16 0.074(4) 0.063(3) 0.074(4) -0.009(3) -0.034(3) -0.008(3) 
C17 0.085(4) 0.075(4) 0.120(5) -0.003(4) -0.033(4) -0.008(3) 
C18 0.122(6) 0.092(5) 0.112(5) -0.024(4) -0.066(5) -0.015(4) 
C19 0.064(3) 0.060(3) 0.055(3) -0.009(3) -0.012(3) -0.014(3) 
C20 0.061(4) 0.074(4) 0.081(4) -0.015(3) -0.009(3) -0.015(3) 
C21 0.065(7) 0.089(7) 0.057(7) -0.031(5) -0.007(5) -0.012(5) 
C22 0.076(4) 0.059(3) 0.069(4) -0.011(3) -0.006(3) -0.018(3) 
C23 0.082(7) 0.121(8) 0.078(6) -0.022(5) -0.001(5) -0.042(6) 
C24 0.101(7) 0.069(5) 0.090(6) -0.025(5) -0.015(5) -0.032(5) 
C25 0.092(4) 0.069(3) 0.049(3) -0.017(3) -0.008(3) -0.032(3) 
C26 0.120(5) 0.076(4) 0.052(4) -0.011(3) -0.028(3) -0.042(4) 
C27 0.095(4) 0.075(4) 0.070(4) -0.013(3) -0.031(3) -0.038(3) 
C28 0.064(4) 0.095(4) 0.055(4) -0.014(3) 0.002(3) -0.025(3) 
C29 0.081(4) 0.078(4) 0.053(3) -0.020(3) 0.000(3) -0.007(3) 
C30 0.077(4) 0.057(3) 0.053(3) -0.020(3) -0.011(3) -0.013(3) 
C31 0.061(3) 0.061(3) 0.057(3) -0.011(2) -0.023(3) -0.010(3) 
C32 0.071(4) 0.069(4) 0.089(4) -0.021(3) -0.035(3) 0.006(3) 
C33 0.087(4) 0.050(3) 0.082(4) -0.015(3) -0.034(3) -0.006(3) 
C34 0.082(4) 0.072(4) 0.077(4) -0.029(3) -0.029(3) -0.024(3) 
C35 0.091(4) 0.081(4) 0.058(3) -0.017(3) -0.033(3) -0.020(3) 
C36 0.078(4) 0.060(3) 0.047(3) -0.009(2) -0.022(3) -0.018(3) 
C21A 0.06(2) 0.078(17) 0.060(14) -0.016(11) 0.016(14) -0.020(15) 
C22A 0.106(17) 0.092(15) 0.105(16) -0.044(13) -0.040(13) -0.033(12) 
C23A 0.114(11) 0.101(11) 0.097(11) -0.039(8) -0.011(8) -0.024(8) 
C101 0.082(5) 0.113(6) 0.080(5) -0.021(4) -0.013(4) -0.016(4) 
C102 0.088(5) 0.148(8) 0.071(5) -0.026(5) -0.002(4) -0.041(6) 
C103 0.121(7) 0.143(8) 0.078(5) -0.034(5) 0.011(5) -0.073(6) 
C104 0.092(6) 0.114(6) 0.074(5) -0.018(4) 0.007(4) -0.027(5) 
C105 0.070(5) 0.147(7) 0.085(5) -0.031(5) -0.010(4) -0.028(5) 
C106 0.082(5) 0.123(6) 0.103(6) -0.037(5) -0.009(4) -0.025(5) 
C107 0.161(9) 0.166(9) 0.232(12) -0.104(8) -0.032(8) -0.049(7) 
C201 0.112(5) 0.091(4) 0.071(4) -0.040(3) -0.009(4) -0.037(4) 
C202 0.122(5) 0.099(4) 0.076(4) -0.031(3) -0.004(4) -0.031(4) 
C203 0.124(5) 0.105(5) 0.083(4) -0.025(4) -0.002(4) -0.027(4) 
C204 0.127(5) 0.103(5) 0.084(4) -0.026(4) 0.004(4) -0.027(4) 
C205 0.117(5) 0.094(4) 0.076(4) -0.034(3) -0.001(4) -0.038(4) 
C206 0.115(5) 0.101(4) 0.076(4) -0.039(3) -0.012(3) -0.040(4) 
C207 0.159(8) 0.147(7) 0.112(7) -0.050(6) -0.030(6) -0.067(6) 
C211 0.179(9) 0.179(9) 0.179(9) -0.062(4) -0.044(4) -0.047(4) 
C212 0.179(9) 0.178(9) 0.179(9) -0.062(4) -0.045(4) -0.048(4) 
C213 0.178(9) 0.178(9) 0.178(9) -0.062(4) -0.045(4) -0.047(4) 
C214 0.176(9) 0.176(9) 0.176(9) -0.063(4) -0.045(4) -0.047(4) 
C215 0.177(9) 0.178(9) 0.177(9) -0.062(4) -0.044(4) -0.047(4) 
C216 0.178(9) 0.178(9) 0.179(9) -0.062(4) -0.044(4) -0.047(4) 
C217 0.186(11) 0.182(11) 0.184(11) -0.074(7) -0.045(7) -0.045(7) 
 
_geom_special_details 
; 
 All esds (except the esd in the dihedral angle between two l.s. planes) 
 are estimated using the full covariance matrix.  The cell esds are taken 
 into account individually in the estimation of esds in distances, angles 
 and torsion angles; correlations between esds in cell parameters are only 
 used when they are defined by crystal symmetry.  An approximate (isotropic) 
 treatment of cell esds is used for estimating esds involving l.s. planes. 
; 
 
loop_ 
 _geom_bond_atom_site_label_1 
 _geom_bond_atom_site_label_2 
 _geom_bond_distance 
 _geom_bond_site_symmetry_2 
 _geom_bond_publ_flag 
Fe1 N7 2.142(3) . ? 
Fe1 N6 2.144(4) . ? 
Fe1 N3 2.164(4) . ? 
Fe1 N10 2.173(4) . ? 
Fe1 N2 2.179(4) . ? 
Fe1 N1 2.184(3) . ? 
S1 C16 1.719(5) . ? 
S1 C15 1.757(6) . ? 
S2 C22 1.751(6) . ? 
S2 C21 1.757(12) . ? 
S2A C21A 1.79(3) . ? 
S2A C20 1.913(10) . ? 
N1 C2 1.328(5) . ? 
N1 C1 1.353(5) . ? 
N2 C11 1.332(5) . ? 
N2 C12 1.367(5) . ? 
N3 C25 1.353(6) . ? 
N3 N4 1.361(5) . ? 
N4 C27 1.334(6) . ? 
N4 B1 1.541(7) . ? 
N5 C28 1.334(6) . ? 
N5 N6 1.348(5) . ? 
N5 B1 1.549(7) . ? 
N6 C30 1.327(5) . ? 
N7 C31 1.325(5) . ? 
N7 N8 1.352(5) . ? 
N8 C33 1.345(6) . ? 
N8 B2 1.550(7) . ? 
N9 C34 1.335(5) . ? 
N9 N10 1.371(5) . ? 
N9 B2 1.547(6) . ? 
N10 C36 1.345(5) . ? 
B1 H1A 0.9800 . ? 
B1 H1B 0.9800 . ? 
B2 H2A 0.9800 . ? 
B2 H2B 0.9800 . ? 
C1 C5 1.399(6) . ? 
C1 C12 1.456(6) . ? 
C2 C3 1.369(6) . ? 
C2 H2 0.9400 . ? 
C3 C4 1.361(6) . ? 
C3 H3 0.9400 . ? 
C4 C5 1.414(6) . ? 
C4 H4 0.9400 . ? 
C5 C6 1.435(6) . ? 
C6 C7 1.385(6) . ? 
C6 C13 1.505(6) . ? 
C7 C8 1.442(6) . ? 
C7 C19 1.484(7) . ? 
C8 C12 1.385(6) . ? 
C8 C9 1.413(6) . ? 
C9 C10 1.359(6) . ? 
C9 H9 0.9400 . ? 
C10 C11 1.385(6) . ? 
C10 H10 0.9400 . ? 
C11 H11 0.9400 . ? 
C13 C16 1.340(7) . ? 
C13 C14 1.418(7) . ? 
C14 C15 1.355(6) . ? 
C14 H14 0.9400 . ? 
C15 C17 1.461(7) . ? 
C16 C18 1.519(7) . ? 
C17 H17A 0.9700 . ? 
C17 H17B 0.9700 . ? 
C17 H17C 0.9700 . ? 
C18 H18A 0.9700 . ? 
C18 H18B 0.9700 . ? 
C18 H18C 0.9700 . ? 
C19 C22 1.364(7) . ? 
C19 C20 1.423(7) . ? 
C20 C22A 1.291(18) . ? 
C20 C21 1.302(11) . ? 
C20 H20 0.9400 . ? 
C21 C23 1.458(12) . ? 
C22 C21A 1.33(3) . ? 
C22 C24 1.428(8) . ? 
C22 H22 0.9400 . ? 
C23 H23A 0.9700 . ? 
C23 H23B 0.9700 . ? 
C23 H23C 0.9700 . ? 
C24 H24A 0.9700 . ? 
C24 H24B 0.9700 . ? 
C24 H24C 0.9700 . ? 
C25 C26 1.375(7) . ? 
C25 H25 0.9400 . ? 
C26 C27 1.367(7) . ? 
C26 H26 0.9400 . ? 
C27 H27 0.9400 . ? 
C28 C29 1.355(7) . ? 
C28 H28 0.9400 . ? 
C29 C30 1.377(7) . ? 
C29 H29 0.9400 . ? 
C30 H30 0.9400 . ? 
C31 C32 1.371(7) . ? 
C31 H31 0.9400 . ? 
C32 C33 1.362(7) . ? 
C32 H32 0.9400 . ? 
C33 H33 0.9400 . ? 
C34 C35 1.373(7) . ? 
C34 H34 0.9400 . ? 
C35 C36 1.375(6) . ? 
C35 H35 0.9400 . ? 
C36 H36 0.9400 . ? 
C21A C23A 1.48(4) . ? 
C22A H22A 0.9700 . ? 
C22A H22B 0.9700 . ? 
C22A H22C 0.9700 . ? 
C23A H23D 0.9700 . ? 
C23A H23E 0.9700 . ? 
C23A H23F 0.9700 . ? 
C101 C102 1.351(9) . ? 
C101 C106 1.376(9) . ? 
C101 H101 0.9400 . ? 
C102 C103 1.360(10) . ? 
C102 H102 0.9400 . ? 
C103 C104 1.368(9) . ? 
C103 H103 0.9400 . ? 
C104 C105 1.370(9) . ? 
C104 H104 0.9400 . ? 
C105 C106 1.369(9) . ? 
C105 H105 0.9400 . ? 
C106 C107 1.510(10) . ? 
C107 H10A 0.9700 . ? 
C107 H10B 0.9700 . ? 
C107 H10C 0.9700 . ? 
C201 C206 1.345(12) . ? 
C201 C202 1.360(14) . ? 
C201 H201 0.9400 . ? 
C202 C203 1.423(13) . ? 
C202 H202 0.9400 . ? 
C203 C204 1.366(14) . ? 
C203 H203 0.9400 . ? 
C204 C205 1.311(14) . ? 
C204 H204 0.9400 . ? 
C205 C206 1.457(13) . ? 
C205 H205 0.9400 . ? 
C206 C207 1.376(13) . ? 
C207 H20A 0.9700 . ? 
C207 H20B 0.9700 . ? 
C207 H20C 0.9700 . ? 
C211 C216 1.33(2) . ? 
C211 C212 1.36(2) . ? 
C211 H211 0.9400 . ? 
C212 C213 1.44(2) . ? 
C212 H212 0.9400 . ? 
C213 C214 1.39(2) . ? 
C213 H213 0.9400 . ? 
C214 C215 1.29(2) . ? 
C214 H214 0.9400 . ? 
C215 C216 1.47(2) . ? 
C215 H215 0.9400 . ? 
C216 C217 1.33(2) . ? 
C217 H21A 0.9700 . ? 
C217 H21B 0.9700 . ? 
C217 H21C 0.9700 . ? 
 
loop_ 
 _geom_angle_atom_site_label_1 
 _geom_angle_atom_site_label_2 
 _geom_angle_atom_site_label_3 
 _geom_angle 
 _geom_angle_site_symmetry_1 
 _geom_angle_site_symmetry_3 
 _geom_angle_publ_flag 
N7 Fe1 N6 91.36(14) . . ? 
N7 Fe1 N3 88.96(14) . . ? 
N6 Fe1 N3 89.19(15) . . ? 
N7 Fe1 N10 89.06(13) . . ? 
N6 Fe1 N10 90.18(14) . . ? 
N3 Fe1 N10 177.91(14) . . ? 
N7 Fe1 N2 99.36(13) . . ? 
N6 Fe1 N2 169.26(13) . . ? 
N3 Fe1 N2 90.31(14) . . ? 
N10 Fe1 N2 90.69(13) . . ? 
N7 Fe1 N1 171.59(14) . . ? 
N6 Fe1 N1 94.03(13) . . ? 
N3 Fe1 N1 97.56(13) . . ? 
N10 Fe1 N1 84.47(13) . . ? 
N2 Fe1 N1 75.41(13) . . ? 
C16 S1 C15 92.6(2) . . ? 
C22 S2 C21 95.0(4) . . ? 
C21A S2A C20 97.0(11) . . ? 
C2 N1 C1 117.1(4) . . ? 
C2 N1 Fe1 126.8(3) . . ? 
C1 N1 Fe1 115.1(3) . . ? 
C11 N2 C12 116.4(4) . . ? 
C11 N2 Fe1 127.8(3) . . ? 
C12 N2 Fe1 115.7(3) . . ? 
C25 N3 N4 105.1(4) . . ? 
C25 N3 Fe1 128.7(3) . . ? 
N4 N3 Fe1 123.2(3) . . ? 
C27 N4 N3 109.8(4) . . ? 
C27 N4 B1 128.5(5) . . ? 
N3 N4 B1 121.2(4) . . ? 
C28 N5 N6 108.3(4) . . ? 
C28 N5 B1 129.3(5) . . ? 
N6 N5 B1 122.2(4) . . ? 
C30 N6 N5 107.1(4) . . ? 
C30 N6 Fe1 126.7(3) . . ? 
N5 N6 Fe1 124.7(3) . . ? 
C31 N7 N8 106.5(4) . . ? 
C31 N7 Fe1 125.2(3) . . ? 
N8 N7 Fe1 123.7(3) . . ? 
C33 N8 N7 109.2(4) . . ? 
C33 N8 B2 128.4(4) . . ? 
N7 N8 B2 122.3(4) . . ? 
C34 N9 N10 110.2(4) . . ? 
C34 N9 B2 128.3(4) . . ? 
N10 N9 B2 121.1(4) . . ? 
C36 N10 N9 105.0(4) . . ? 
C36 N10 Fe1 129.1(3) . . ? 
N9 N10 Fe1 124.2(3) . . ? 
N4 B1 N5 109.7(4) . . ? 
N4 B1 H1A 109.7 . . ? 
N5 B1 H1A 109.7 . . ? 
N4 B1 H1B 109.7 . . ? 
N5 B1 H1B 109.7 . . ? 
H1A B1 H1B 108.2 . . ? 
N9 B2 N8 109.0(4) . . ? 
N9 B2 H2A 109.9 . . ? 
N8 B2 H2A 109.9 . . ? 
N9 B2 H2B 109.9 . . ? 
N8 B2 H2B 109.9 . . ? 
H2A B2 H2B 108.3 . . ? 
N1 C1 C5 124.1(4) . . ? 
N1 C1 C12 117.1(4) . . ? 
C5 C1 C12 118.8(4) . . ? 
N1 C2 C3 123.1(4) . . ? 
N1 C2 H2 118.5 . . ? 
C3 C2 H2 118.5 . . ? 
C4 C3 C2 120.6(4) . . ? 
C4 C3 H3 119.7 . . ? 
C2 C3 H3 119.7 . . ? 
C3 C4 C5 118.9(4) . . ? 
C3 C4 H4 120.5 . . ? 
C5 C4 H4 120.5 . . ? 
C1 C5 C4 116.3(4) . . ? 
C1 C5 C6 120.6(4) . . ? 
C4 C5 C6 123.1(4) . . ? 
C7 C6 C5 120.5(4) . . ? 
C7 C6 C13 121.5(4) . . ? 
C5 C6 C13 117.9(4) . . ? 
C6 C7 C8 119.0(4) . . ? 
C6 C7 C19 121.5(4) . . ? 
C8 C7 C19 119.4(4) . . ? 
C12 C8 C9 116.2(4) . . ? 
C12 C8 C7 121.3(4) . . ? 
C9 C8 C7 122.5(4) . . ? 
C10 C9 C8 119.8(5) . . ? 
C10 C9 H9 120.1 . . ? 
C8 C9 H9 120.1 . . ? 
C9 C10 C11 119.7(4) . . ? 
C9 C10 H10 120.2 . . ? 
C11 C10 H10 120.2 . . ? 
N2 C11 C10 123.3(4) . . ? 
N2 C11 H11 118.4 . . ? 
C10 C11 H11 118.4 . . ? 
N2 C12 C8 124.7(4) . . ? 
N2 C12 C1 115.8(4) . . ? 
C8 C12 C1 119.5(4) . . ? 
C16 C13 C14 112.2(4) . . ? 
C16 C13 C6 123.7(5) . . ? 
C14 C13 C6 124.0(5) . . ? 
C15 C14 C13 115.7(5) . . ? 
C15 C14 H14 122.1 . . ? 
C13 C14 H14 122.1 . . ? 
C14 C15 C17 131.9(6) . . ? 
C14 C15 S1 107.8(4) . . ? 
C17 C15 S1 120.3(4) . . ? 
C13 C16 C18 129.2(5) . . ? 
C13 C16 S1 111.6(4) . . ? 
C18 C16 S1 119.1(4) . . ? 
C15 C17 H17A 109.5 . . ? 
C15 C17 H17B 109.5 . . ? 
H17A C17 H17B 109.5 . . ? 
C15 C17 H17C 109.5 . . ? 
H17A C17 H17C 109.5 . . ? 
H17B C17 H17C 109.5 . . ? 
C16 C18 H18A 109.5 . . ? 
C16 C18 H18B 109.5 . . ? 
H18A C18 H18B 109.5 . . ? 
C16 C18 H18C 109.5 . . ? 
H18A C18 H18C 109.5 . . ? 
H18B C18 H18C 109.5 . . ? 
C22 C19 C20 112.4(5) . . ? 
C22 C19 C7 124.1(5) . . ? 
C20 C19 C7 123.4(5) . . ? 
C22A C20 C21 102.0(12) . . ? 
C22A C20 C19 138.6(11) . . ? 
C21 C20 C19 119.4(8) . . ? 
C22A C20 S2A 118.7(11) . . ? 
C19 C20 S2A 100.9(5) . . ? 
C21 C20 H20 120.3 . . ? 
C19 C20 H20 120.3 . . ? 
S2A C20 H20 137.1 . . ? 
C20 C21 C23 133.7(11) . . ? 
C20 C21 S2 105.8(8) . . ? 
C23 C21 S2 120.4(9) . . ? 
C21A C22 C19 128.9(15) . . ? 
C21A C22 C24 98.9(16) . . ? 
C19 C22 C24 131.2(6) . . ? 
C19 C22 S2 107.3(4) . . ? 
C24 C22 S2 121.4(5) . . ? 
C21A C22 H22 115.6 . . ? 
C19 C22 H22 115.6 . . ? 
S2 C22 H22 134.0 . . ? 
C22 C24 H24A 109.5 . . ? 
C22 C24 H24B 109.5 . . ? 
C22 C24 H24C 109.5 . . ? 
N3 C25 C26 111.1(5) . . ? 
N3 C25 H25 124.4 . . ? 
C26 C25 H25 124.4 . . ? 
C27 C26 C25 104.5(5) . . ? 
C27 C26 H26 127.8 . . ? 
C25 C26 H26 127.8 . . ? 
N4 C27 C26 109.4(5) . . ? 
N4 C27 H27 125.3 . . ? 
C26 C27 H27 125.3 . . ? 
N5 C28 C29 109.9(5) . . ? 
N5 C28 H28 125.1 . . ? 
C29 C28 H28 125.1 . . ? 
C28 C29 C30 104.3(5) . . ? 
C28 C29 H29 127.8 . . ? 
C30 C29 H29 127.8 . . ? 
N6 C30 C29 110.4(5) . . ? 
N6 C30 H30 124.8 . . ? 
C29 C30 H30 124.8 . . ? 
N7 C31 C32 110.7(5) . . ? 
N7 C31 H31 124.6 . . ? 
C32 C31 H31 124.6 . . ? 
C33 C32 C31 105.3(5) . . ? 
C33 C32 H32 127.4 . . ? 
C31 C32 H32 127.4 . . ? 
N8 C33 C32 108.3(5) . . ? 
N8 C33 H33 125.9 . . ? 
C32 C33 H33 125.9 . . ? 
N9 C34 C35 108.5(4) . . ? 
N9 C34 H34 125.7 . . ? 
C35 C34 H34 125.7 . . ? 
C34 C35 C36 105.1(4) . . ? 
C34 C35 H35 127.5 . . ? 
C36 C35 H35 127.5 . . ? 
N10 C36 C35 111.2(4) . . ? 
N10 C36 H36 124.4 . . ? 
C35 C36 H36 124.4 . . ? 
C22 C21A C23A 139(3) . . ? 
C22 C21A S2A 100(2) . . ? 
C23A C21A S2A 121(2) . . ? 
C20 C22A H22A 109.5 . . ? 
C20 C22A H22B 109.5 . . ? 
H22A C22A H22B 109.5 . . ? 
C20 C22A H22C 109.5 . . ? 
H22A C22A H22C 109.5 . . ? 
H22B C22A H22C 109.5 . . ? 
C21A C23A H23D 109.5 . . ? 
C21A C23A H23E 109.5 . . ? 
H23D C23A H23E 109.5 . . ? 
C21A C23A H23F 109.5 . . ? 
H23D C23A H23F 109.5 . . ? 
H23E C23A H23F 109.5 . . ? 
C102 C101 C106 120.6(7) . . ? 
C102 C101 H101 119.7 . . ? 
C106 C101 H101 119.7 . . ? 
C101 C102 C103 121.6(8) . . ? 
C101 C102 H102 119.2 . . ? 
C103 C102 H102 119.2 . . ? 
C102 C103 C104 119.1(8) . . ? 
C102 C103 H103 120.4 . . ? 
C104 C103 H103 120.4 . . ? 
C103 C104 C105 119.0(8) . . ? 
C103 C104 H104 120.5 . . ? 
C105 C104 H104 120.5 . . ? 
C106 C105 C104 122.2(7) . . ? 
C106 C105 H105 118.9 . . ? 
C104 C105 H105 118.9 . . ? 
C105 C106 C101 117.4(8) . . ? 
C105 C106 C107 121.1(8) . . ? 
C101 C106 C107 121.5(9) . . ? 
C106 C107 H10A 109.5 . . ? 
C106 C107 H10B 109.5 . . ? 
H10A C107 H10B 109.5 . . ? 
C106 C107 H10C 109.5 . . ? 
H10A C107 H10C 109.5 . . ? 
H10B C107 H10C 109.5 . . ? 
C206 C201 C202 123.1(11) . . ? 
C206 C201 H201 118.4 . . ? 
C202 C201 H201 118.4 . . ? 
C201 C202 C203 119.8(12) . . ? 
C201 C202 H202 120.1 . . ? 
C203 C202 H202 120.1 . . ? 
C204 C203 C202 114.3(12) . . ? 
C204 C203 H203 122.8 . . ? 
C202 C203 H203 122.8 . . ? 
C205 C204 C203 128.6(13) . . ? 
C205 C204 H204 115.7 . . ? 
C203 C204 H204 115.7 . . ? 
C204 C205 C206 115.6(11) . . ? 
C204 C205 H205 122.2 . . ? 
C206 C205 H205 122.2 . . ? 
C201 C206 C207 121.8(10) . . ? 
C201 C206 C205 118.4(11) . . ? 
C207 C206 C205 119.8(10) . . ? 
C216 C211 C212 124(3) . . ? 
C216 C211 H211 118.0 . . ? 
C212 C211 H211 118.0 . . ? 
C211 C212 C213 114(3) . . ? 
C211 C212 H212 122.9 . . ? 
C213 C212 H212 122.9 . . ? 
C214 C213 C212 116(3) . . ? 
C214 C213 H213 121.8 . . ? 
C212 C213 H213 121.8 . . ? 
C215 C214 C213 129(3) . . ? 
C215 C214 H214 115.7 . . ? 
C213 C214 H214 115.7 . . ? 
C214 C215 C216 111(2) . . ? 
C214 C215 H215 124.3 . . ? 
C216 C215 H215 124.3 . . ? 
C217 C216 C211 113(2) . . ? 
C217 C216 C215 125(3) . . ? 
C211 C216 C215 122(2) . . ? 
C216 C217 H21A 109.5 . . ? 
C216 C217 H21B 109.5 . . ? 
H21A C217 H21B 109.5 . . ? 
C216 C217 H21C 109.5 . . ? 
H21A C217 H21C 109.5 . . ? 
H21B C217 H21C 109.5 . . ? 
 
loop_ 
 _geom_torsion_atom_site_label_1 
 _geom_torsion_atom_site_label_2 
 _geom_torsion_atom_site_label_3 
 _geom_torsion_atom_site_label_4 
 _geom_torsion 
 _geom_torsion_site_symmetry_1 
 _geom_torsion_site_symmetry_2 
 _geom_torsion_site_symmetry_3 
 _geom_torsion_site_symmetry_4 
 _geom_torsion_publ_flag 
N6 Fe1 N1 C2 -5.3(4) . . . . ? 
N3 Fe1 N1 C2 -95.0(4) . . . . ? 
N10 Fe1 N1 C2 84.5(4) . . . . ? 
N2 Fe1 N1 C2 176.7(4) . . . . ? 
N6 Fe1 N1 C1 -173.6(3) . . . . ? 
N3 Fe1 N1 C1 96.7(3) . . . . ? 
N10 Fe1 N1 C1 -83.8(3) . . . . ? 
N2 Fe1 N1 C1 8.4(3) . . . . ? 
N7 Fe1 N2 C11 -9.5(4) . . . . ? 
N6 Fe1 N2 C11 166.7(7) . . . . ? 
N3 Fe1 N2 C11 79.5(4) . . . . ? 
N10 Fe1 N2 C11 -98.7(4) . . . . ? 
N1 Fe1 N2 C11 177.2(4) . . . . ? 
N7 Fe1 N2 C12 166.7(3) . . . . ? 
N6 Fe1 N2 C12 -17.1(9) . . . . ? 
N3 Fe1 N2 C12 -104.3(3) . . . . ? 
N10 Fe1 N2 C12 77.5(3) . . . . ? 
N1 Fe1 N2 C12 -6.6(3) . . . . ? 
N7 Fe1 N3 C25 55.4(4) . . . . ? 
N6 Fe1 N3 C25 146.8(4) . . . . ? 
N2 Fe1 N3 C25 -43.9(4) . . . . ? 
N1 Fe1 N3 C25 -119.3(4) . . . . ? 
N7 Fe1 N3 N4 -101.9(3) . . . . ? 
N6 Fe1 N3 N4 -10.6(3) . . . . ? 
N2 Fe1 N3 N4 158.7(3) . . . . ? 
N1 Fe1 N3 N4 83.4(3) . . . . ? 
C25 N3 N4 C27 -0.5(5) . . . . ? 
Fe1 N3 N4 C27 161.4(3) . . . . ? 
C25 N3 N4 B1 172.5(4) . . . . ? 
Fe1 N3 N4 B1 -25.7(5) . . . . ? 
C28 N5 N6 C30 -1.4(5) . . . . ? 
B1 N5 N6 C30 -177.1(4) . . . . ? 
C28 N5 N6 Fe1 -167.9(3) . . . . ? 
B1 N5 N6 Fe1 16.4(5) . . . . ? 
N7 Fe1 N6 C30 -59.7(4) . . . . ? 
N3 Fe1 N6 C30 -148.6(4) . . . . ? 
N10 Fe1 N6 C30 29.4(4) . . . . ? 
N2 Fe1 N6 C30 124.0(7) . . . . ? 
N1 Fe1 N6 C30 113.8(4) . . . . ? 
N7 Fe1 N6 N5 104.1(3) . . . . ? 
N3 Fe1 N6 N5 15.2(3) . . . . ? 
N10 Fe1 N6 N5 -166.8(3) . . . . ? 
N2 Fe1 N6 N5 -72.2(8) . . . . ? 
N1 Fe1 N6 N5 -82.4(3) . . . . ? 
N6 Fe1 N7 C31 -51.3(4) . . . . ? 
N3 Fe1 N7 C31 37.9(4) . . . . ? 
N10 Fe1 N7 C31 -141.4(4) . . . . ? 
N2 Fe1 N7 C31 128.0(4) . . . . ? 
N6 Fe1 N7 N8 101.6(3) . . . . ? 
N3 Fe1 N7 N8 -169.2(3) . . . . ? 
N10 Fe1 N7 N8 11.4(3) . . . . ? 
N2 Fe1 N7 N8 -79.1(3) . . . . ? 
C31 N7 N8 C33 -0.6(5) . . . . ? 
Fe1 N7 N8 C33 -157.7(3) . . . . ? 
C31 N7 N8 B2 -178.5(4) . . . . ? 
Fe1 N7 N8 B2 24.4(5) . . . . ? 
C34 N9 N10 C36 1.5(5) . . . . ? 
B2 N9 N10 C36 174.5(4) . . . . ? 
C34 N9 N10 Fe1 167.8(3) . . . . ? 
B2 N9 N10 Fe1 -19.2(5) . . . . ? 
N7 Fe1 N10 C36 149.0(4) . . . . ? 
N6 Fe1 N10 C36 57.7(4) . . . . ? 
N2 Fe1 N10 C36 -111.6(4) . . . . ? 
N1 Fe1 N10 C36 -36.4(4) . . . . ? 
N7 Fe1 N10 N9 -13.9(3) . . . . ? 
N6 Fe1 N10 N9 -105.2(3) . . . . ? 
N2 Fe1 N10 N9 85.5(3) . . . . ? 
N1 Fe1 N10 N9 160.7(3) . . . . ? 
C27 N4 B1 N5 -126.3(5) . . . . ? 
N3 N4 B1 N5 62.3(6) . . . . ? 
C28 N5 B1 N4 128.1(5) . . . . ? 
N6 N5 B1 N4 -57.1(6) . . . . ? 
C34 N9 B2 N8 -129.9(5) . . . . ? 
N10 N9 B2 N8 58.5(6) . . . . ? 
C33 N8 B2 N9 120.1(5) . . . . ? 
N7 N8 B2 N9 -62.5(6) . . . . ? 
C2 N1 C1 C5 0.7(6) . . . . ? 
Fe1 N1 C1 C5 170.2(3) . . . . ? 
C2 N1 C1 C12 -178.7(4) . . . . ? 
Fe1 N1 C1 C12 -9.2(5) . . . . ? 
C1 N1 C2 C3 0.0(6) . . . . ? 
Fe1 N1 C2 C3 -168.1(3) . . . . ? 
N1 C2 C3 C4 -0.2(7) . . . . ? 
C2 C3 C4 C5 -0.2(7) . . . . ? 
N1 C1 C5 C4 -1.1(6) . . . . ? 
C12 C1 C5 C4 178.3(4) . . . . ? 
N1 C1 C5 C6 178.6(4) . . . . ? 
C12 C1 C5 C6 -2.0(6) . . . . ? 
C3 C4 C5 C1 0.8(6) . . . . ? 
C3 C4 C5 C6 -178.9(4) . . . . ? 
C1 C5 C6 C7 -1.9(7) . . . . ? 
C4 C5 C6 C7 177.7(4) . . . . ? 
C1 C5 C6 C13 175.3(4) . . . . ? 
C4 C5 C6 C13 -5.0(7) . . . . ? 
C5 C6 C7 C8 3.8(7) . . . . ? 
C13 C6 C7 C8 -173.4(4) . . . . ? 
C5 C6 C7 C19 -174.6(4) . . . . ? 
C13 C6 C7 C19 8.3(7) . . . . ? 
C6 C7 C8 C12 -1.6(7) . . . . ? 
C19 C7 C8 C12 176.8(4) . . . . ? 
C6 C7 C8 C9 178.2(4) . . . . ? 
C19 C7 C8 C9 -3.4(7) . . . . ? 
C12 C8 C9 C10 2.6(7) . . . . ? 
C7 C8 C9 C10 -177.2(4) . . . . ? 
C8 C9 C10 C11 -1.9(7) . . . . ? 
C12 N2 C11 C10 0.3(6) . . . . ? 
Fe1 N2 C11 C10 176.5(3) . . . . ? 
C9 C10 C11 N2 0.4(7) . . . . ? 
C11 N2 C12 C8 0.6(6) . . . . ? 
Fe1 N2 C12 C8 -176.0(3) . . . . ? 
C11 N2 C12 C1 -179.2(4) . . . . ? 
Fe1 N2 C12 C1 4.1(5) . . . . ? 
C9 C8 C12 N2 -2.0(6) . . . . ? 
C7 C8 C12 N2 177.8(4) . . . . ? 
C9 C8 C12 C1 177.8(4) . . . . ? 
C7 C8 C12 C1 -2.4(6) . . . . ? 
N1 C1 C12 N2 3.4(6) . . . . ? 
C5 C1 C12 N2 -176.0(4) . . . . ? 
N1 C1 C12 C8 -176.5(4) . . . . ? 
C5 C1 C12 C8 4.2(6) . . . . ? 
C7 C6 C13 C16 74.8(7) . . . . ? 
C5 C6 C13 C16 -102.4(6) . . . . ? 
C7 C6 C13 C14 -107.4(6) . . . . ? 
C5 C6 C13 C14 75.4(6) . . . . ? 
C16 C13 C14 C15 -1.2(7) . . . . ? 
C6 C13 C14 C15 -179.2(5) . . . . ? 
C13 C14 C15 C17 -177.4(6) . . . . ? 
C13 C14 C15 S1 1.7(6) . . . . ? 
C16 S1 C15 C14 -1.3(5) . . . . ? 
C16 S1 C15 C17 177.8(5) . . . . ? 
C14 C13 C16 C18 -178.4(6) . . . . ? 
C6 C13 C16 C18 -0.3(9) . . . . ? 
C14 C13 C16 S1 0.1(6) . . . . ? 
C6 C13 C16 S1 178.1(4) . . . . ? 
C15 S1 C16 C13 0.7(5) . . . . ? 
C15 S1 C16 C18 179.4(5) . . . . ? 
C6 C7 C19 C22 66.8(7) . . . . ? 
C8 C7 C19 C22 -111.5(6) . . . . ? 
C6 C7 C19 C20 -115.6(6) . . . . ? 
C8 C7 C19 C20 66.1(6) . . . . ? 
C22 C19 C20 C22A 171.0(15) . . . . ? 
C7 C19 C20 C22A -6.9(17) . . . . ? 
C22 C19 C20 C21 -4.4(9) . . . . ? 
C7 C19 C20 C21 177.7(6) . . . . ? 
C22 C19 C20 S2A 8.2(6) . . . . ? 
C7 C19 C20 S2A -169.7(4) . . . . ? 
C21A S2A C20 C22A -170.1(15) . . . . ? 
C21A S2A C20 C21 146(2) . . . . ? 
C21A S2A C20 C19 -2.9(11) . . . . ? 
C22A C20 C21 C23 2.4(16) . . . . ? 
C19 C20 C21 C23 179.3(9) . . . . ? 
S2A C20 C21 C23 144(2) . . . . ? 
C22A C20 C21 S2 -173.5(10) . . . . ? 
C19 C20 C21 S2 3.3(9) . . . . ? 
S2A C20 C21 S2 -31.6(13) . . . . ? 
C22 S2 C21 C20 -1.2(7) . . . . ? 
C22 S2 C21 C23 -177.9(8) . . . . ? 
C20 C19 C22 C21A -14(2) . . . . ? 
C7 C19 C22 C21A 163.6(18) . . . . ? 
C20 C19 C22 C24 179.5(7) . . . . ? 
C7 C19 C22 C24 -2.7(10) . . . . ? 
C20 C19 C22 S2 2.9(6) . . . . ? 
C7 C19 C22 S2 -179.3(4) . . . . ? 
C21 S2 C22 C21A 148(3) . . . . ? 
C21 S2 C22 C19 -1.0(5) . . . . ? 
C21 S2 C22 C24 -178.0(6) . . . . ? 
N4 N3 C25 C26 0.5(5) . . . . ? 
Fe1 N3 C25 C26 -160.0(4) . . . . ? 
N3 C25 C26 C27 -0.3(6) . . . . ? 
N3 N4 C27 C26 0.3(6) . . . . ? 
B1 N4 C27 C26 -172.0(5) . . . . ? 
C25 C26 C27 N4 0.0(6) . . . . ? 
N6 N5 C28 C29 1.4(6) . . . . ? 
B1 N5 C28 C29 176.7(4) . . . . ? 
N5 C28 C29 C30 -0.8(6) . . . . ? 
N5 N6 C30 C29 0.9(5) . . . . ? 
Fe1 N6 C30 C29 167.0(3) . . . . ? 
C28 C29 C30 N6 -0.1(6) . . . . ? 
N8 N7 C31 C32 0.4(5) . . . . ? 
Fe1 N7 C31 C32 157.1(4) . . . . ? 
N7 C31 C32 C33 -0.1(6) . . . . ? 
N7 N8 C33 C32 0.5(6) . . . . ? 
B2 N8 C33 C32 178.2(5) . . . . ? 
C31 C32 C33 N8 -0.3(6) . . . . ? 
N10 N9 C34 C35 -0.9(6) . . . . ? 
B2 N9 C34 C35 -173.3(5) . . . . ? 
N9 C34 C35 C36 0.0(6) . . . . ? 
N9 N10 C36 C35 -1.5(5) . . . . ? 
Fe1 N10 C36 C35 -166.9(3) . . . . ? 
C34 C35 C36 N10 0.9(6) . . . . ? 
C19 C22 C21A C23A -179(3) . . . . ? 
C24 C22 C21A C23A -10(4) . . . . ? 
S2 C22 C21A C23A 141(6) . . . . ? 
C19 C22 C21A S2A 11(2) . . . . ? 
C24 C22 C21A S2A -179.9(11) . . . . ? 
S2 C22 C21A S2A -29(2) . . . . ? 
C20 S2A C21A C22 -3.0(17) . . . . ? 
C20 S2A C21A C23A -176(2) . . . . ? 
C106 C101 C102 C103 -0.3(11) . . . . ? 
C101 C102 C103 C104 0.0(11) . . . . ? 
C102 C103 C104 C105 0.6(10) . . . . ? 
C103 C104 C105 C106 -0.8(11) . . . . ? 
C104 C105 C106 C101 0.4(11) . . . . ? 
C104 C105 C106 C107 -178.2(7) . . . . ? 
C102 C101 C106 C105 0.1(10) . . . . ? 
C102 C101 C106 C107 178.8(7) . . . . ? 
C206 C201 C202 C203 -3.6(16) . . . . ? 
C201 C202 C203 C204 2.9(15) . . . . ? 
C202 C203 C204 C205 -1.6(18) . . . . ? 
C203 C204 C205 C206 0.7(17) . . . . ? 
C202 C201 C206 C207 -176.1(12) . . . . ? 
C202 C201 C206 C205 2.5(15) . . . . ? 
C204 C205 C206 C201 -1.0(14) . . . . ? 
C204 C205 C206 C207 177.7(11) . . . . ? 
C216 C211 C212 C213 -14(7) . . . . ? 
C211 C212 C213 C214 20(6) . . . . ? 
C212 C213 C214 C215 -22(8) . . . . ? 
C213 C214 C215 C216 14(7) . . . . ? 
C212 C211 C216 C217 -171(5) . . . . ? 
C212 C211 C216 C215 7(5) . . . . ? 
C214 C215 C216 C217 172(4) . . . . ? 
C214 C215 C216 C211 -6(4) . . . . ? 
 
_diffrn_measured_fraction_theta_max    0.967 
_diffrn_reflns_theta_full              25.00 
_diffrn_measured_fraction_theta_full   0.980 
_refine_diff_density_max    0.437 
_refine_diff_density_min   -0.609 
_refine_diff_density_rms    0.061 
